# Supplementary material for: Effect of dye end groups in non-fullerene fluorene- and carbazole-based small molecule acceptors on photovoltaic performance
Source: Royal Society of Chemistry journal article supplement (doi:10.1039/c5ra03607k), 2015-01-01
Supplement: c5ra03607k1.pdf [file c5ra03607k1.pdf]

## Supporting Information

# Effect of Dye End Groups in Non-Fullerene Fluorene- and Carbazole-Based Small Molecule Acceptors on Photovoltaic Performance

Yujeong Kim,<sup>a</sup> Chang Eun Song,<sup>b</sup> Sang-Jin Moon,<sup>b</sup> Eunhee Lim<sup>a,†</sup>

<sup>a</sup>Department of Chemistry, Kyonggi University, San 94-6, Iui-dong, Yeongtong-gu, Suwon-si, Gyeonggi 443-760, Republic of Korea

<sup>b</sup>Korea Research Institute of Chemical Technology (KRICT), 100 Jang-dong, Yuseong-gu, Daejeon 305-600, Republic of Korea

\* Corresponding author: Tel. +82-31-249-9663; E-mail address: [ehlim@kyonggi.ac.kr](mailto:ehlim@kyonggi.ac.kr)

### Contents

|                                                        |     |
|--------------------------------------------------------|-----|
| 1. <sup>1</sup> H and <sup>13</sup> C NMR spectra..... | S3  |
| 2. OPV characteristics.....                            | S7  |
| 3. Atomic force microscopy (AFM) images.....           | S11 |
| 4. UV absorption spectra of the films.....             | S12 |

## List of Table

|                                                                                                    |    |
|----------------------------------------------------------------------------------------------------|----|
| Table S1 – OPV performances of P3HT:Cz-based acceptors and P3HT:PCBM under various conditions..... | S7 |
| Table S2 – OPV performances of P3HT:Flu-based acceptors under various conditions.....              | S8 |
| Table S3 – OPV devices using small molecules as donors.....                                        | S9 |

## List of Figures

|                                                                                                                                                                                                                                               |     |
|-----------------------------------------------------------------------------------------------------------------------------------------------------------------------------------------------------------------------------------------------|-----|
| Figure S1 – <sup>1</sup> H NMR spectra of <b>Cz-ECA</b> .....                                                                                                                                                                                 | S3  |
| Figure S2 – <sup>13</sup> C NMR spectra of <b>Cz-ECA</b> .....                                                                                                                                                                                | S3  |
| Figure S3 – <sup>1</sup> H NMR spectra of <b>Flu-ECA</b> .....                                                                                                                                                                                | S4  |
| Figure S4 – <sup>13</sup> C NMR spectra of <b>Flu-ECA</b> .....                                                                                                                                                                               | S4  |
| Figure S5 – <sup>1</sup> H NMR spectra of <b>Cz-IN</b> .....                                                                                                                                                                                  | S5  |
| Figure S6 – <sup>13</sup> C NMR spectra of <b>Cz-IN</b> .....                                                                                                                                                                                 | S5  |
| Figure S7 – <sup>1</sup> H NMR spectra of <b>Flu-IN</b> .....                                                                                                                                                                                 | S6  |
| Figure S8 – <sup>13</sup> C NMR spectra of <b>Flu-IN</b> .....                                                                                                                                                                                | S6  |
| Figure S9 – <i>J-V</i> (left) and EQE (right) curves of OPV devices using (a) <b>Flu-ECA</b> and (b) <b>Flu-IN</b> as acceptors with various blend ratios (D:A).....                                                                          | S9  |
| Figure S10 – <i>J-V</i> curves of OPV devices using small molecules as donors.....                                                                                                                                                            | S10 |
| Figure S11 – Phase images (2 × 2 μm) of (a) P3HT: <b>Cz-ECA</b> , (b) <b>P3HT:Cz-RH</b> , (c) P3HT: <b>Cz-IN</b> , (d) P3HT: <b>Flu-ECA</b> , (e) P3HT: <b>Flu-RH</b> , (f) P3HT: <b>Flu-IN</b> , and (g) P3HT:PC <sub>61</sub> BM films..... | S11 |
| Figure S12 – UV-visible absorption spectra of the films spin-coated from chloroform solution.....                                                                                                                                             | S12 |

## 1. $^1\text{H}$ and $^{13}\text{C}$ NMR spectra

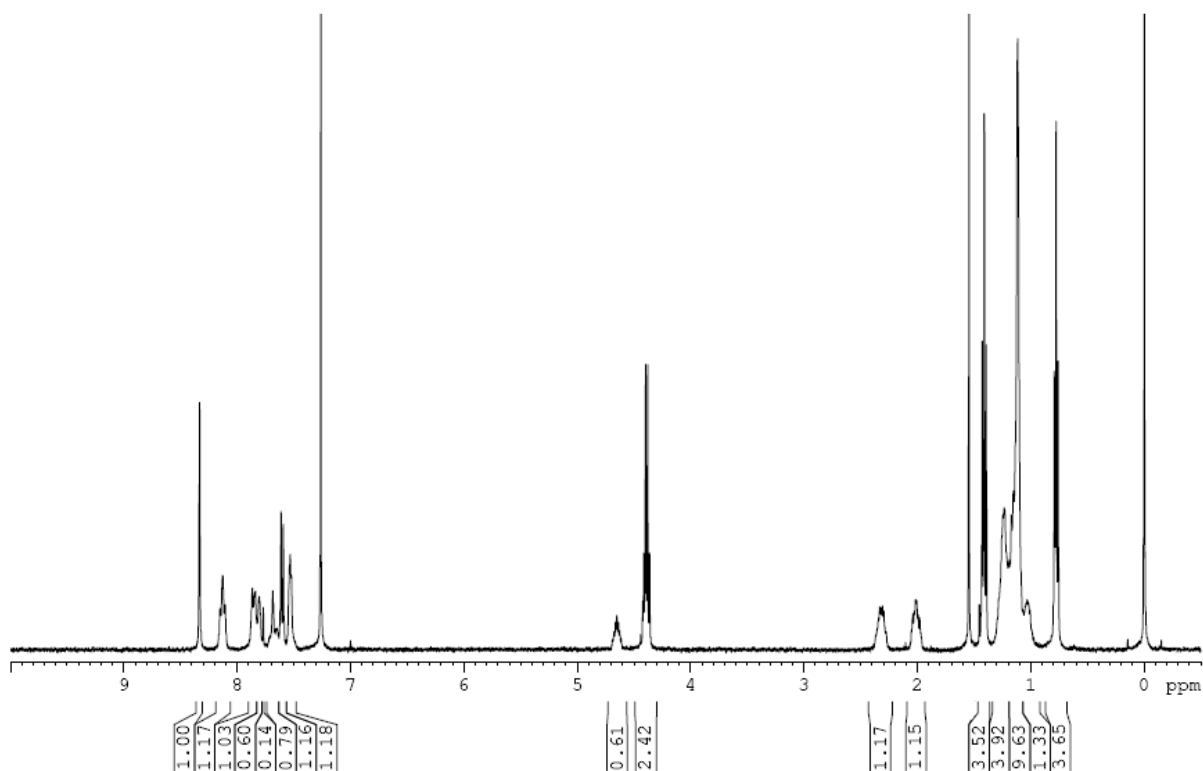

**Figure S1.**  $^1\text{H}$  NMR spectra of Cz-ECA.

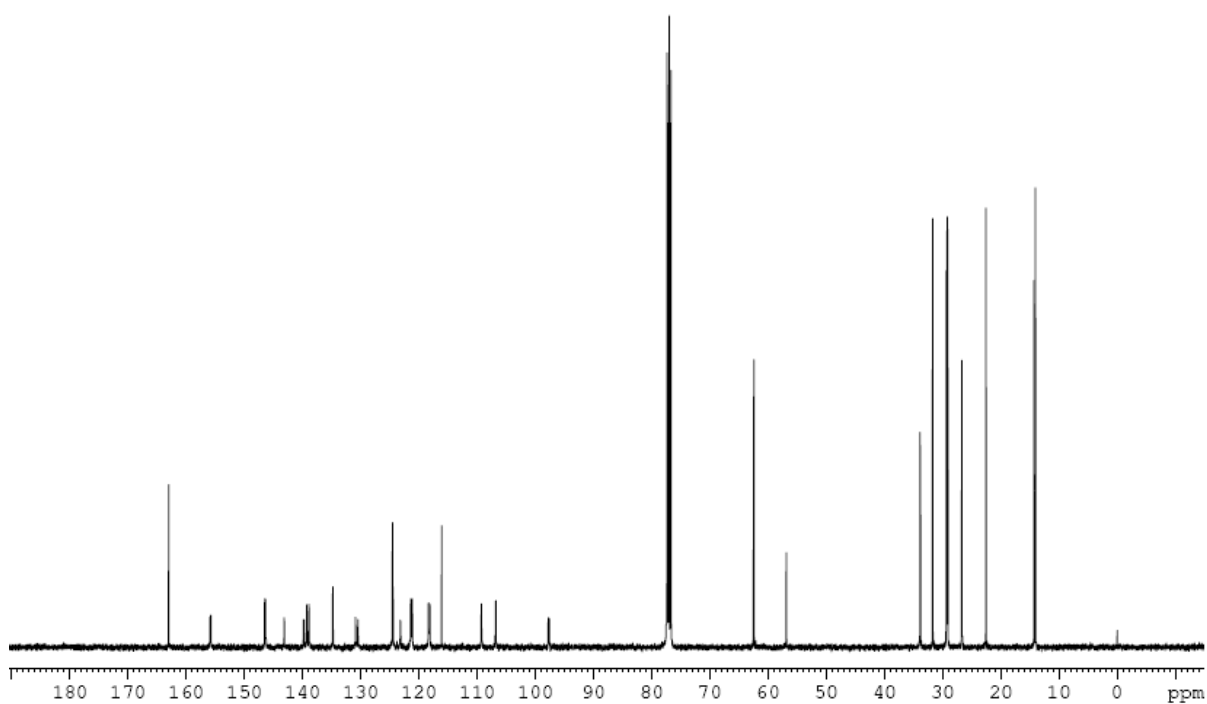

**Figure S2.**  $^{13}\text{C}$  NMR spectra of Cz-ECA.

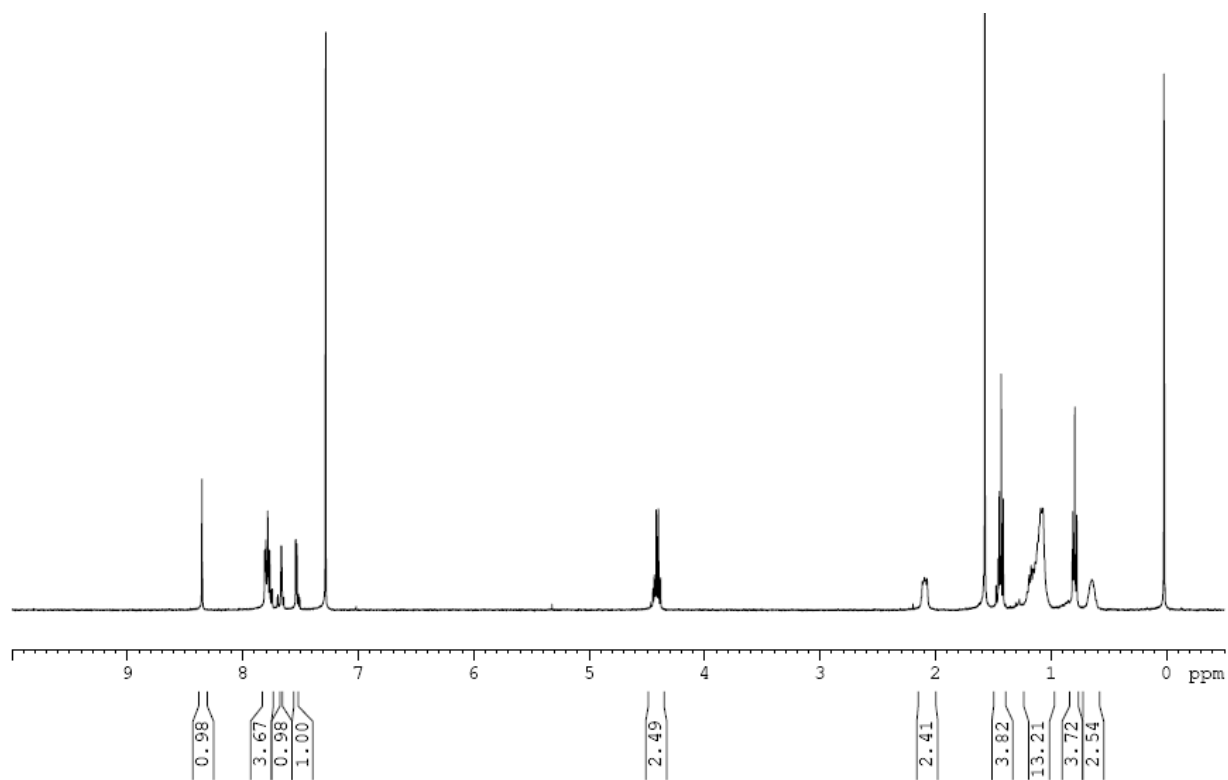

**Figure S3.**  $^1\text{H}$  NMR spectra of **Flu-ECA**.

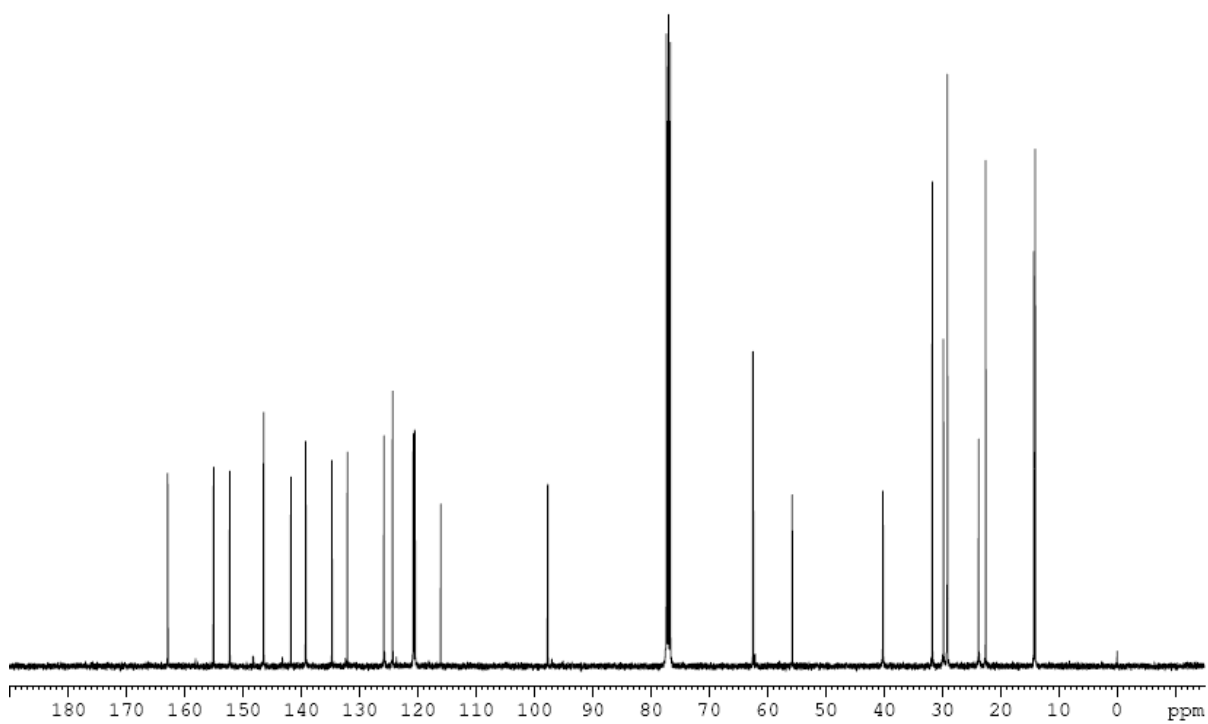

**Figure S4.**  $^{13}\text{C}$  NMR spectra of **Flu-ECA**.

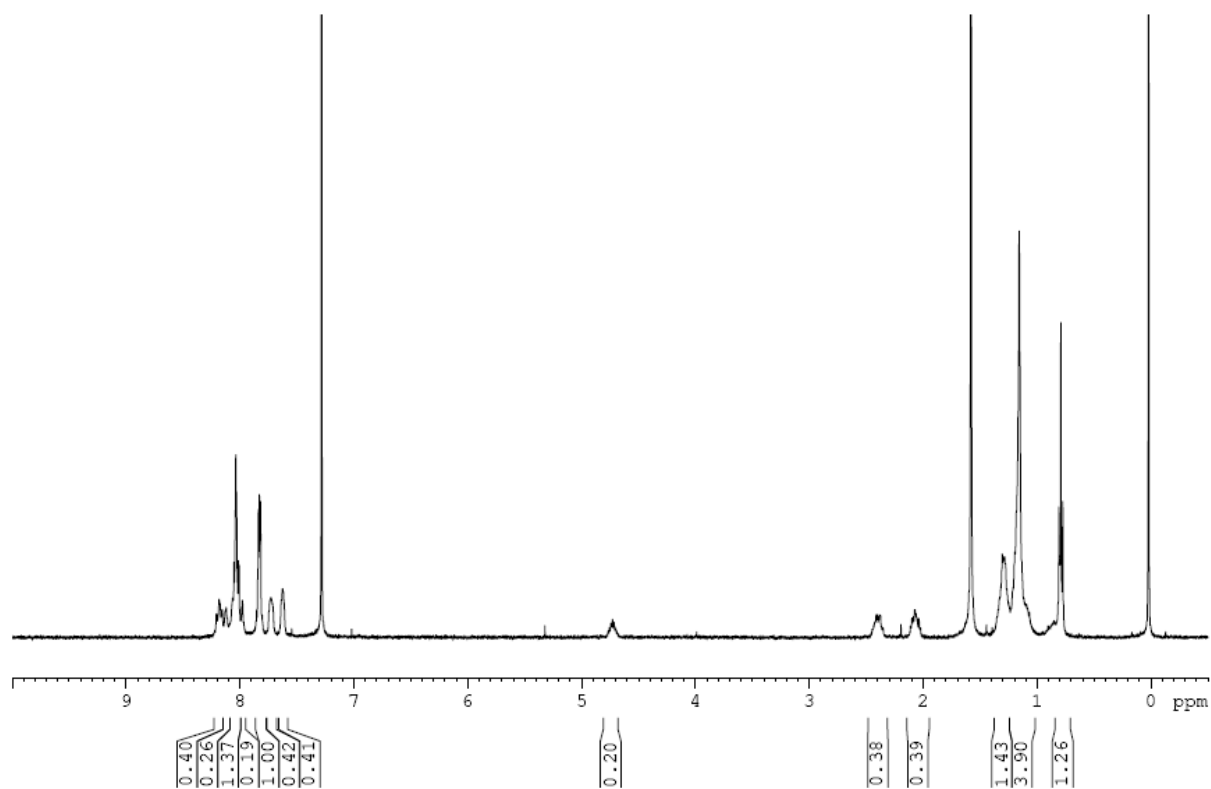

**Figure S5.**  $^1\text{H}$  NMR spectra of Cz-IN.

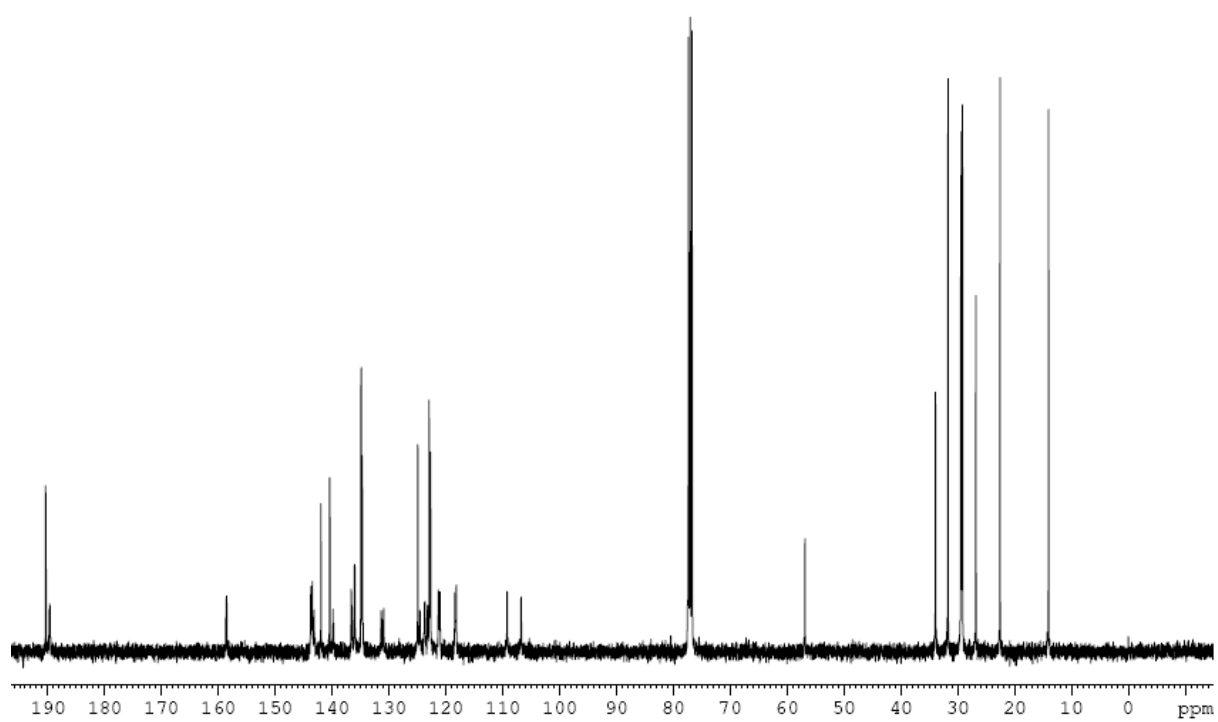

**Figure S6.**  $^{13}\text{C}$  NMR spectra of Cz-IN.

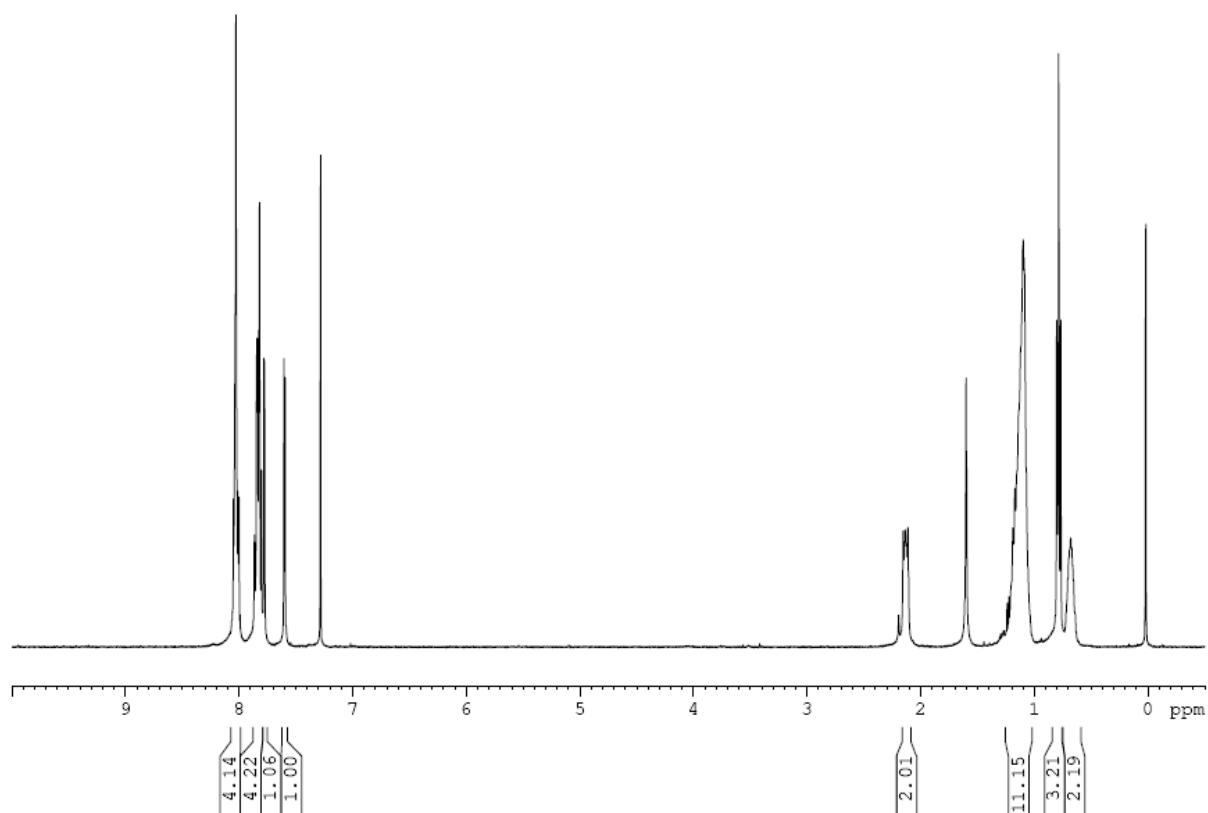

**Figure S7.**  $^1\text{H}$  NMR spectra of **Flu-IN**.

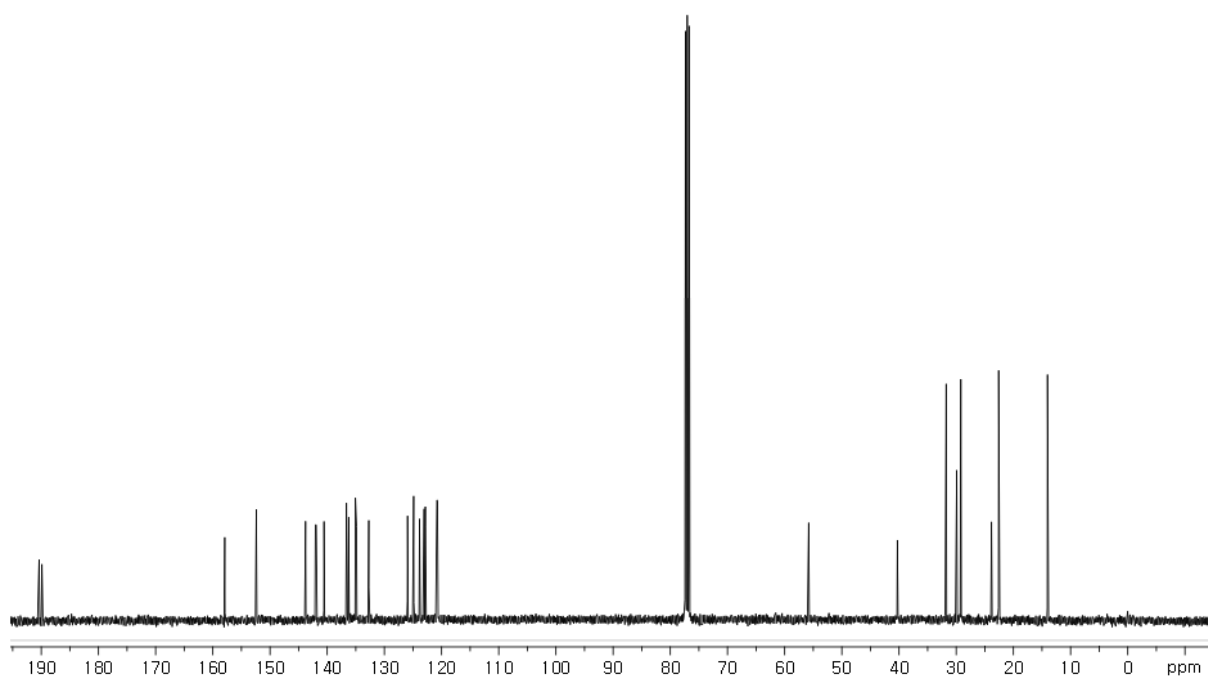

**Figure S8.**  $^{13}\text{C}$  NMR spectra of **Flu-IN**.

## 2. OPV characteristics

**Table S1.** Photovoltaic properties of the small molecules fabricated under various conditions

| Acceptor                 | D:A ratio | $T_a$ (°C) <sup>a</sup> | $V_{OC}$ (V) | $J_{SC}$ (mA/cm <sup>2</sup> ) | FF (%) | PCE (%) |
|--------------------------|-----------|-------------------------|--------------|--------------------------------|--------|---------|
| <b>Cz-ECA</b>            | 1.0:1.5   | 80                      | 0.98         | 2.31                           | 42     | 0.96    |
|                          | 1.0:1.5   | 100                     | 1.00         | 2.34                           | 44     | 1.03    |
|                          | 1.0:1.5   | 120                     | 1.00         | 2.32                           | 43     | 1.00    |
| <b>Cz-IN</b>             | 1.0:1.5   | 80                      | 0.54         | 0.11                           | 27     | 0.02    |
|                          | 1.0:1.5   | 100                     | 0.61         | 0.13                           | 26     | 0.02    |
|                          | 1.0:1.5   | 120                     | 0.49         | 0.13                           | 26     | 0.02    |
| <b>Cz-RH<sup>b</sup></b> | 1.0:1.5   | 80                      | 1.03         | 4.82                           | 50     | 2.50    |
|                          | 1.0:1.5   | 100                     | 1.03         | 4.69                           | 53     | 2.56    |
|                          | 1.0:1.5   | 120                     | 1.03         | 4.63                           | 50     | 2.40    |
| <b>PC<sub>61</sub>BM</b> | 1.0:1.0   | W/O                     | 0.57         | 9.04                           | 60     | 3.14    |
|                          | 1.0:1.0   | 120                     | 0.59         | 8.59                           | 63     | 3.16    |
|                          | 1.0:1.0   | 150                     | 0.60         | 9.08                           | 61     | 3.34    |

<sup>a</sup>The films were annealed at the annealing temperature ( $T_a$ ) for 10 min. <sup>b</sup>Taken from ref. 35.

**Table S2.** Photovoltaic properties of the small molecules fabricated under various conditions

| Acceptor                   | D:A ratio | $T_a$ ( $^{\circ}\text{C}$ ) <sup>a</sup> | $V_{\text{OC}}$ (V) | $J_{\text{SC}}$ (mA/cm <sup>2</sup> ) | FF (%) | PCE (%) |
|----------------------------|-----------|-------------------------------------------|---------------------|---------------------------------------|--------|---------|
| <b>Flu-ECA</b>             | 1.0:0.5   | 80                                        | 1.01                | 2.31                                  | 40     | 0.94    |
|                            | 1.0:0.5   | 100                                       | 1.01                | 2.22                                  | 41     | 0.94    |
|                            | 1.0:0.5   | 120                                       | 1.00                | 2.48                                  | 43     | 1.07    |
|                            | 1.0:1.0   | 80                                        | 1.04                | 2.86                                  | 41     | 1.23    |
|                            | 1.0:1.0   | 100                                       | 1.03                | 2.82                                  | 44     | 1.26    |
|                            | 1.0:1.0   | 120                                       | 1.02                | 2.65                                  | 41     | 1.10    |
|                            | 1.0:1.5   | 80                                        | 1.03                | 2.96                                  | 41     | 1.25    |
|                            | 1.0:1.5   | 100                                       | 1.04                | 2.87                                  | 42     | 1.25    |
|                            | 1.0:1.5   | 120                                       | 1.03                | 2.91                                  | 42     | 1.25    |
| <b>Flu-IN</b>              | 1.0:0.5   | 80                                        | 0.83                | 2.74                                  | 43     | 0.98    |
|                            | 1.0:0.5   | 100                                       | 0.83                | 2.63                                  | 43     | 0.95    |
|                            | 1.0:0.5   | 120                                       | 0.54                | 1.45                                  | 39     | 0.31    |
|                            | 1.0:1.0   | 80                                        | 0.92                | 3.40                                  | 42     | 1.32    |
|                            | 1.0:1.0   | 100                                       | 0.92                | 3.20                                  | 44     | 1.28    |
|                            | 1.0:1.0   | 120                                       | 0.52                | 2.05                                  | 35     | 0.38    |
|                            | 1.0:1.5   | 80                                        | 0.91                | 2.90                                  | 42     | 1.14    |
|                            | 1.0:1.5   | 100                                       | 0.91                | 2.86                                  | 42     | 1.11    |
|                            | 1.0:1.5   | 120                                       | 0.43                | 1.17                                  | 40     | 0.20    |
| <b>Flu-RH</b> <sup>b</sup> | 1.0:1.0   | 90                                        | 1.01                | 5.22                                  | 48     | 2.53    |
|                            | 1.0:1.0   | 120                                       | 1.04                | 5.44                                  | 51     | 2.89    |
|                            | 1.0:1.0   | 150                                       | 1.04                | 5.29                                  | 50     | 2.78    |
|                            | 1.0:1.5   | 80                                        | 1.03                | 5.61                                  | 51     | 2.95    |
|                            | 1.0:1.5   | 120                                       | 1.03                | 5.52                                  | 53     | 3.00    |
|                            | 1.0:1.5   | 150                                       | 1.05                | 4.71                                  | 53     | 2.60    |

<sup>a</sup>The films were annealed at the annealing temperature ( $T_a$ ) for 10 min. <sup>b</sup>Taken from ref. 35.



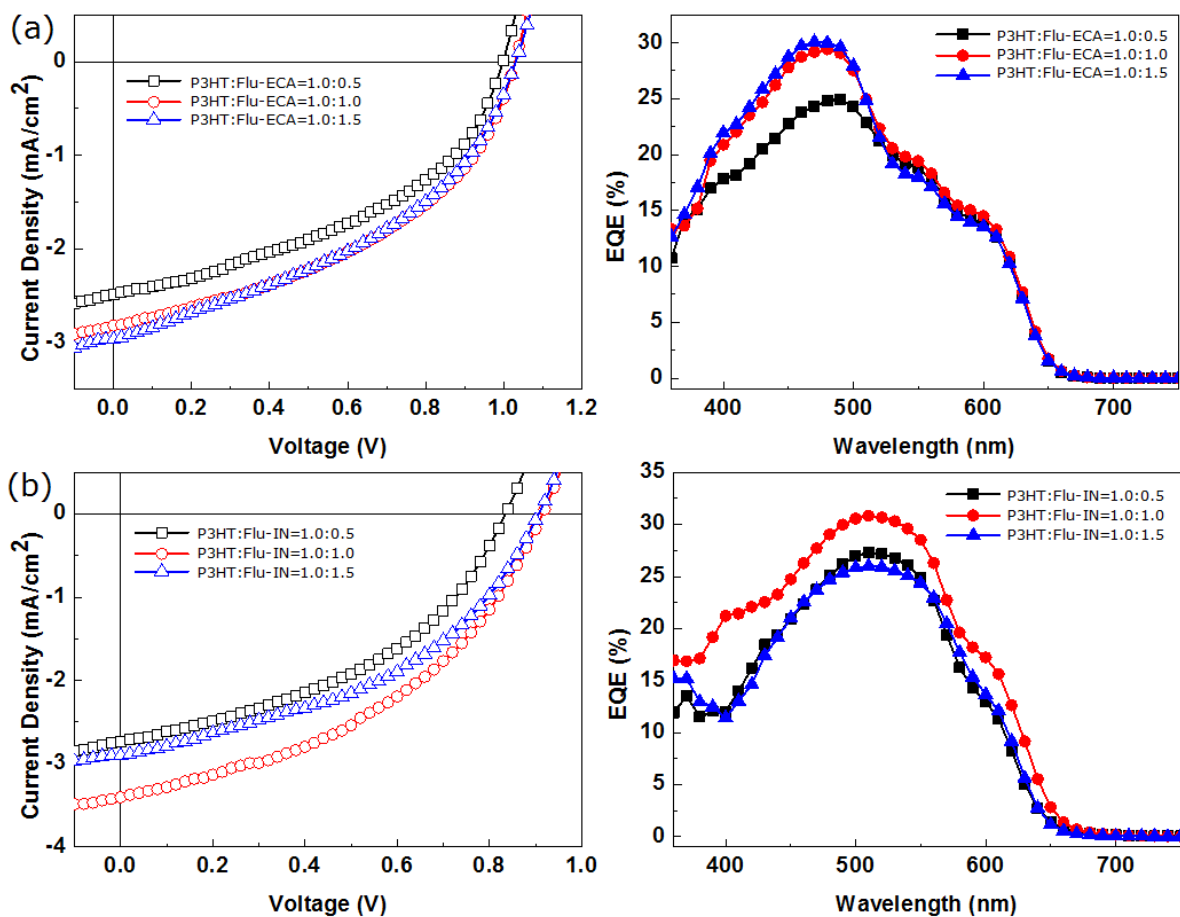

**Figure S9.**  $J-V$  (left) and EQE (right) curves of OPV devices using (a) **Flu-ECA** and (b) **Flu-IN** as acceptors with various blend ratios (D:A).

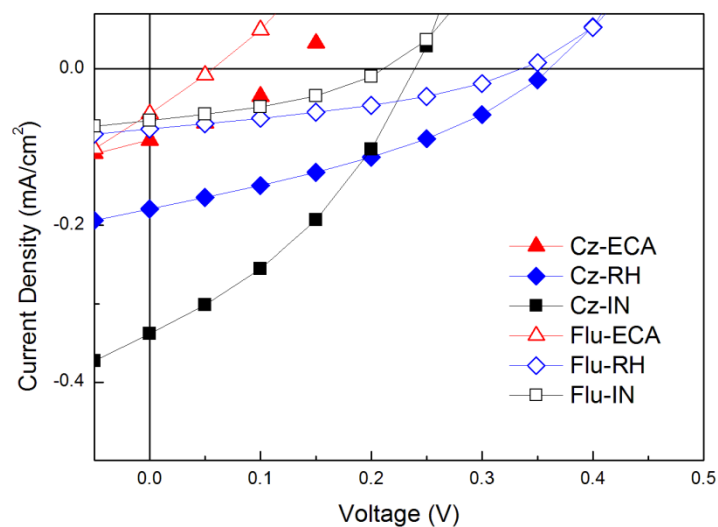

**Figure S10.**  $J$ - $V$  curves of OPV devices using small molecules as donors.

**Table S3.** OPV devices using small molecules as donors<sup>a</sup>

| Donor          | $T_a$ (°C) <sup>b</sup> | $V_{OC}$ (V) | $J_{SC}$ (mA/cm <sup>2</sup> ) | FF (%) | PCE (%) |
|----------------|-------------------------|--------------|--------------------------------|--------|---------|
| <b>Cz-ECA</b>  | 100                     | 0.13         | 0.08                           | 34     | 0.00    |
| <b>Cz-RH</b>   | 100                     | 0.36         | 0.18                           | 35     | 0.02    |
| <b>Cz-IN</b>   | 100                     | 0.24         | 0.34                           | 36     | 0.03    |
| <b>Flu-ECA</b> | 100                     | 0.06         | 0.06                           | 13     | 0.00    |
| <b>Flu-RH</b>  | 100                     | 0.35         | 0.09                           | 34     | 0.01    |
| <b>Flu-IN</b>  | 80                      | 0.21         | 0.07                           | 38     | 0.01    |

<sup>a</sup> ITO/PEDOT:PSS/small molecule:PC<sub>71</sub>BM (1:1)/LiF/Al. <sup>b</sup> The films were annealed at  $T_a$  for 10 min.

### 3. Atomic force microscopy (AFM) images

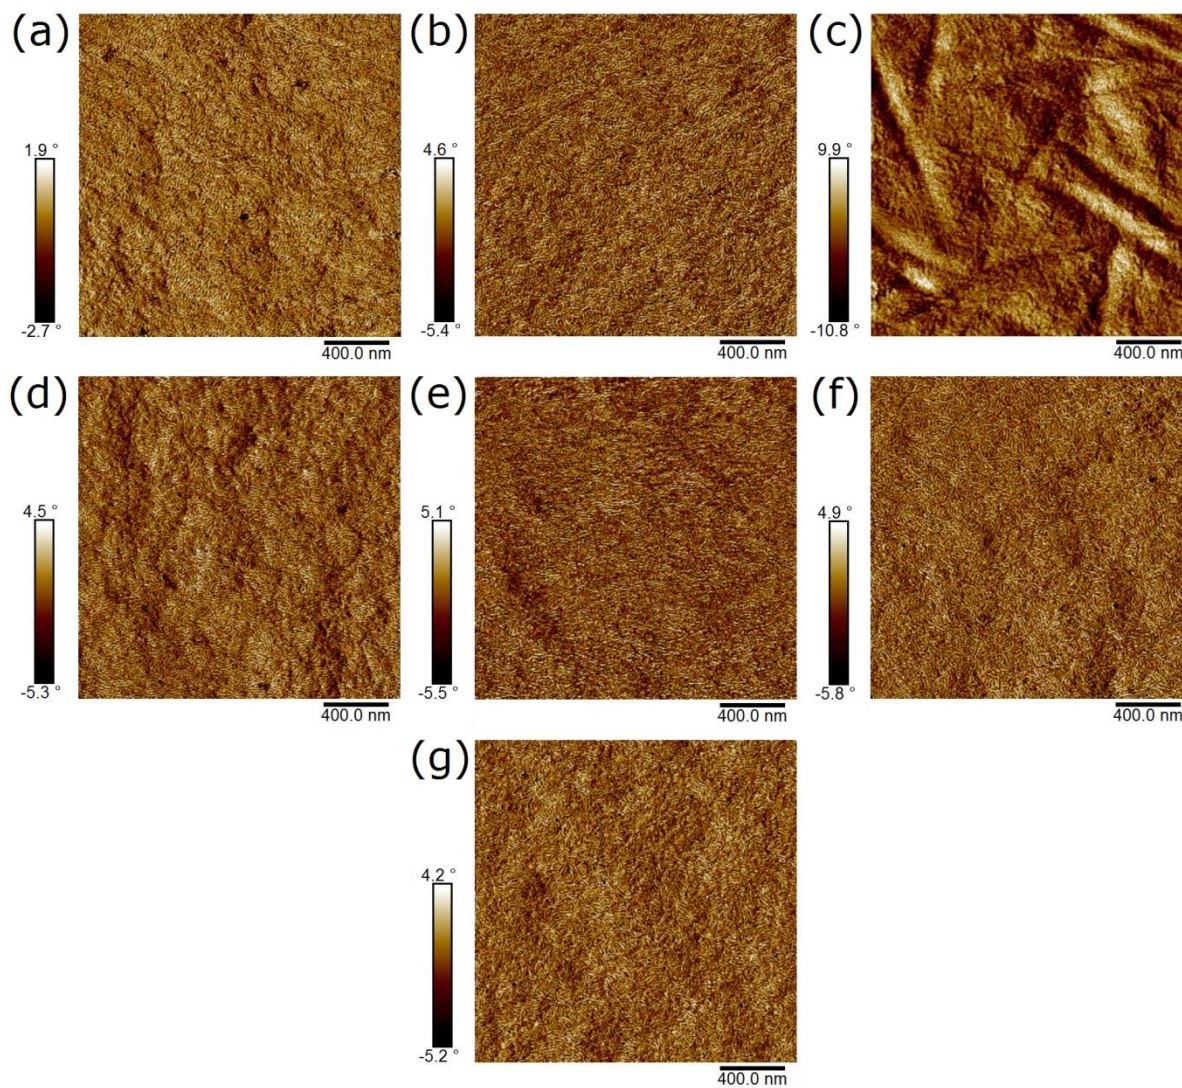

**Figure S11.** Phase images ( $2 \times 2 \mu\text{m}$ ) of (a) P3HT:Cz-ECA, (b) P3HT:Cz-RH, (c) P3HT:Cz-IN, (d) P3HT:Flu-ECA, (e) P3HT:Flu-RH, (f) P3HT:Flu-IN, and (g) P3HT:PC<sub>61</sub>BM films.

#### 4. UV absorption spectra of the films

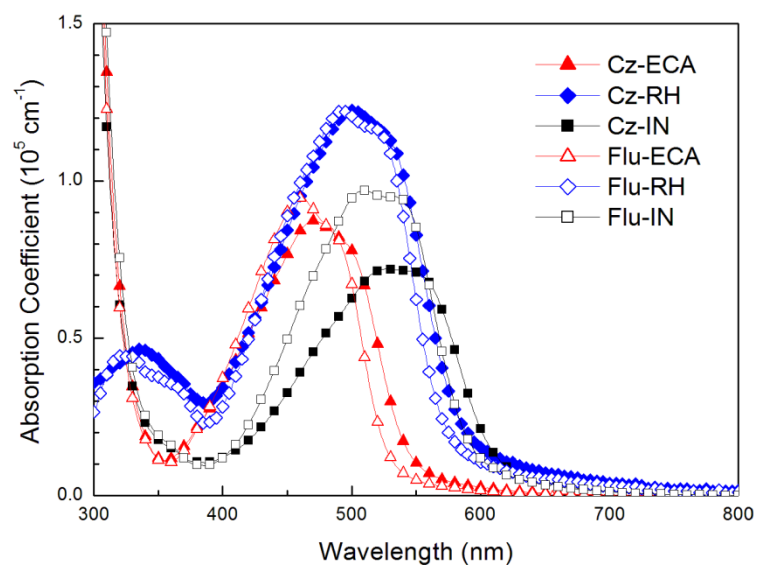

**Figure S12.** UV-visible absorption spectra of the films spin-coated from chloroform solution.
